# Supplementary material for: Kinetic and thermodynamic sorption studies of Fe(iii) and Zr(iv) by DFO@Purolite, a desferrioxamine B based chelating resin
Source: Royal Society of Chemistry journal article supplement (doi:10.1039/d3nj00903c), 2023-01-01
Supplement: d3nj00903c1.pdf [file d3nj00903c1.pdf]

# **Kinetic and thermodynamic sorption studies of Fe(III) and Zr(IV) by DFO@Purolite, a desferrioxamine B based chelating resin**

Giancarla Alberti,\*<sup>a</sup> Camilla Zanoni,<sup>a</sup> Vittorio Losi,<sup>a</sup> Sara Rovertoni,<sup>a</sup> Lisa Rita Magnaghi,<sup>a</sup>  
Osian Fonquernie,<sup>b</sup> Stéphane Brandès,<sup>b</sup> Agnese Amati,<sup>c</sup> Jean-Claude Chambron,<sup>c</sup>  
Nicolas Maudoux,<sup>d</sup> Raffaella Biesuz,<sup>a</sup> and Michel Meyer\*<sup>b</sup>

<sup>a</sup> *Dipartimento di Chimica - Università degli Studi di Pavia, via Taramelli 12, 27100 Pavia, Italy*

<sup>b</sup> *Institut de Chimie Moléculaire de l'Université de Bourgogne (ICMUB), UMR 6302, CNRS, Université de Bourgogne, 9 avenue Alain Savary, BP 47870, 21078 Dijon Cedex, France*

<sup>c</sup> *Institut de Chimie de Strasbourg, UMR 7177, CNRS, Université de Strasbourg, 1 rue Blaise Pascal, BP 296 R 8, 67008 Strasbourg Cedex, France*

<sup>d</sup> *TrisKem International, 3 rue des Champs Géons, ZAC de l'Éperon, 35170 Bruz, France*

**Supplementary Information**

## Contents

|      |                                    |   |
|------|------------------------------------|---|
| I.   | Infrared spectroscopy              | 3 |
| II.  | Thermogravimetric analyses (TGA)   | 4 |
| III. | Scanning electron microscopy (SEM) | 5 |
| IV.  | Luminescence emission spectroscopy | 6 |
| V.   | Two-photon microscopy              | 7 |
| VI.  | Auxiliary equilibrium constants    | 8 |

## I. Infrared spectroscopy

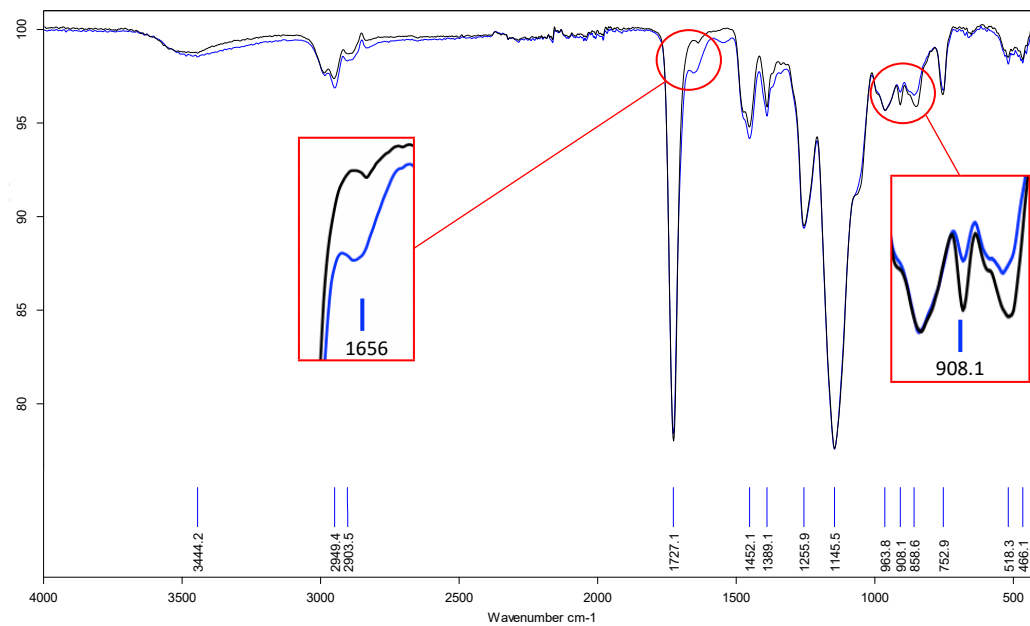

**Figure S1.** ATR FT-MIR spectra of pristine Purolite® ECR8209 (black line) and DFO@Purolite (red line) recorded at a resolution of 4 cm<sup>-1</sup>.

## II. Thermogravimetric analyses (TGA)

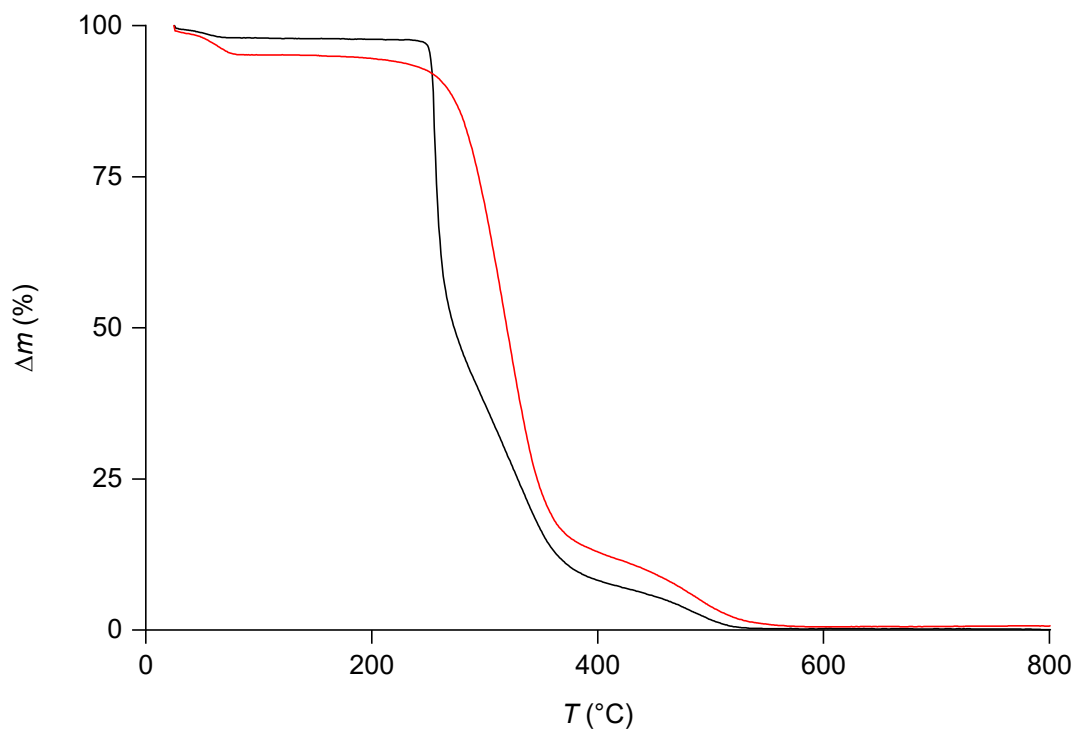

**Figure S2.** Thermograms of pristine Purolite<sup>®</sup> ECR8209 (black line) and DFO@Purolite (red line) recorded under a N<sub>2</sub> (30 mL min<sup>-1</sup>)/O<sub>2</sub> (10 mL min<sup>-1</sup>) gas stream at a heating rate of 10 °C min<sup>-1</sup>.

### III. Scanning electron microscopy (SEM)

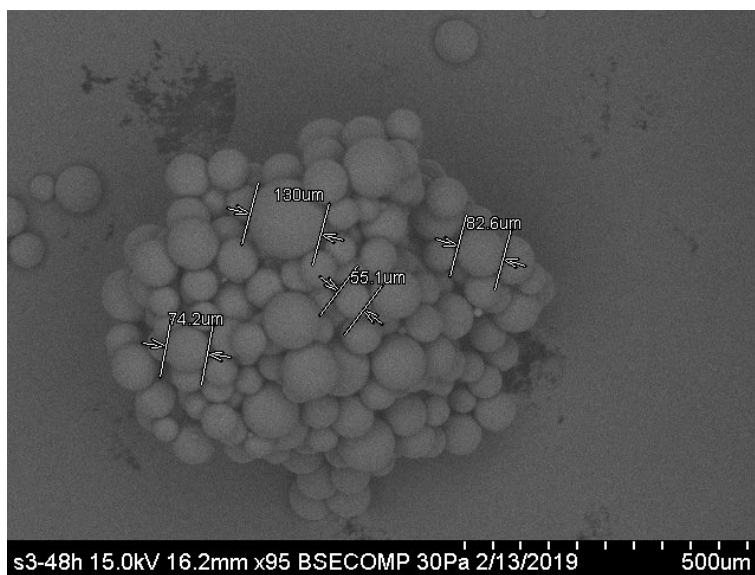

**Figure S3.** SEM image of gold-sputtered Purolite<sup>®</sup> ECR8209 resin. Magnification:  $\times 95$ , working distance: 16.2 mm, acceleration voltage: 15.0 kV, vacuum: 30 Pa.

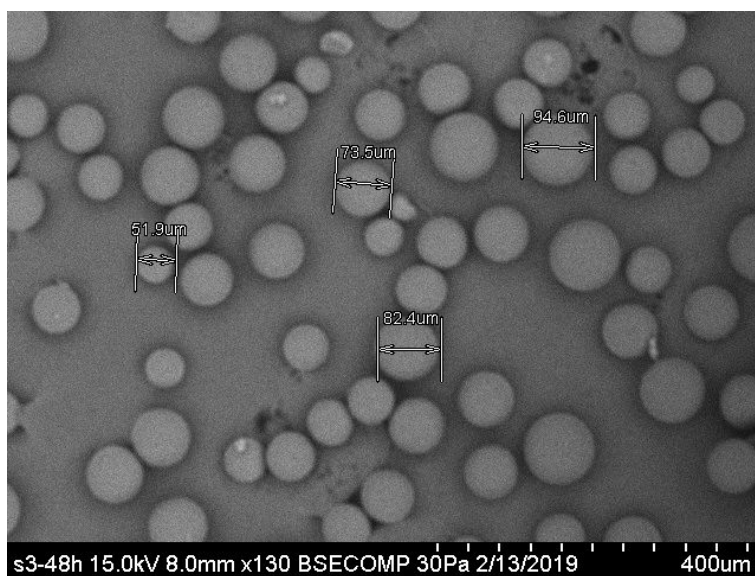

**Figure S4.** SEM image of gold-sputtered DFO@Purolite resin. Magnification:  $\times 130$ , working distance: 8.0 mm, acceleration voltage: 15.0 kV, vacuum: 30 Pa.

#### IV. Luminescence emission spectroscopy

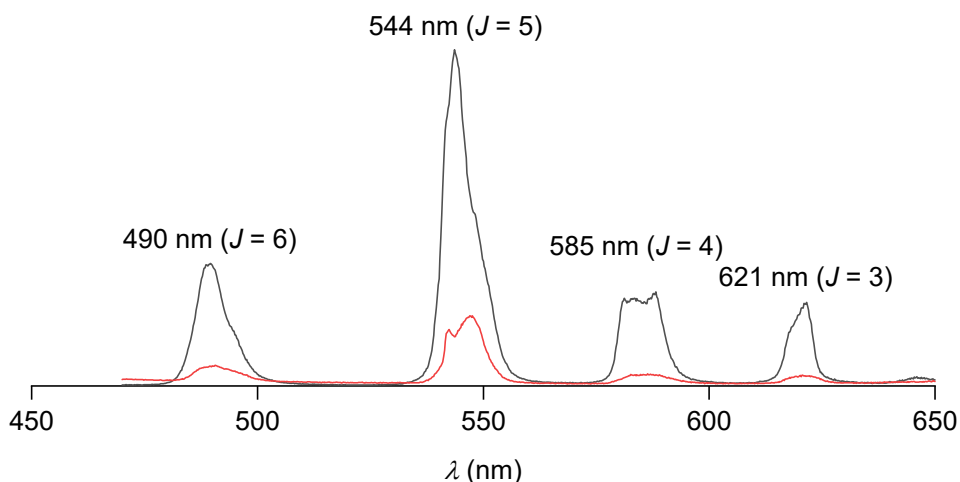

**Figure S5.** Emission spectra of a 0.015 M  $\text{Tb}(\text{NO}_3)_3$  solution in 0.01 M  $\text{HNO}_3$  showing the  ${}^5\text{D}_4 \rightarrow {}^7\text{F}_J$  transitions (black line) and of  $[\text{Tb}(\text{DFO})\text{H}]^+$  at pH 9.6 (red line).  $\lambda_{\text{ex}} = 355$  nm.

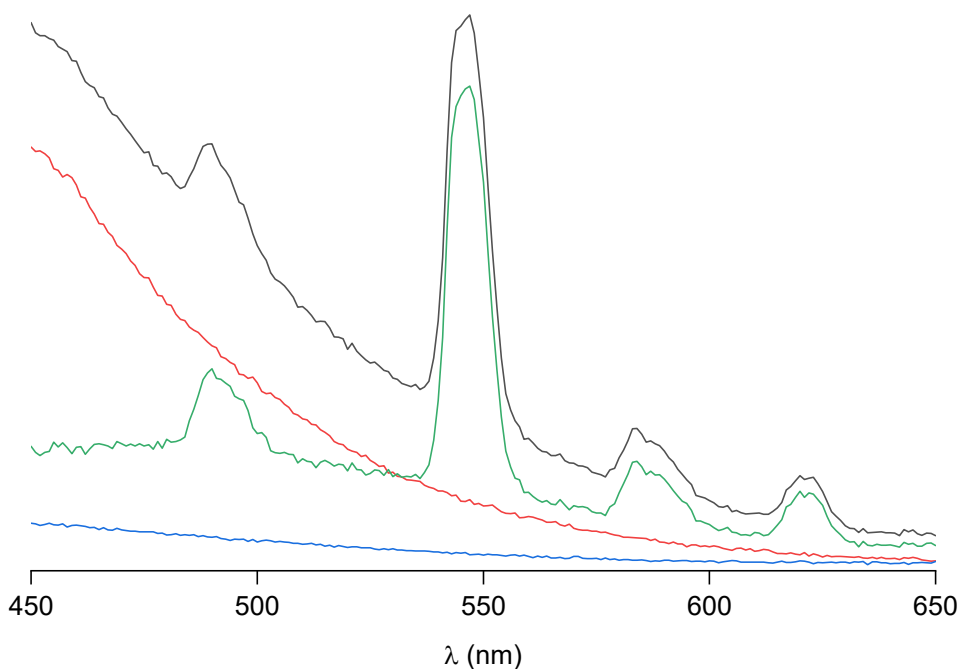

**Figure S6.** Emission spectra of pristine Purolite<sup>®</sup> ECR8209 (blue line), DFO@Purolite (red line), and Tb(DFO)@Purolite (black line) resins. The green line corresponds to the Tb(DFO)@Purolite spectrum after subtraction of the DFO@Purolite contribution.  $\lambda_{\text{ex}} = 355$  nm, entrance and exit slit bandpass: 2 nm.

## V. Two-photon microscopy

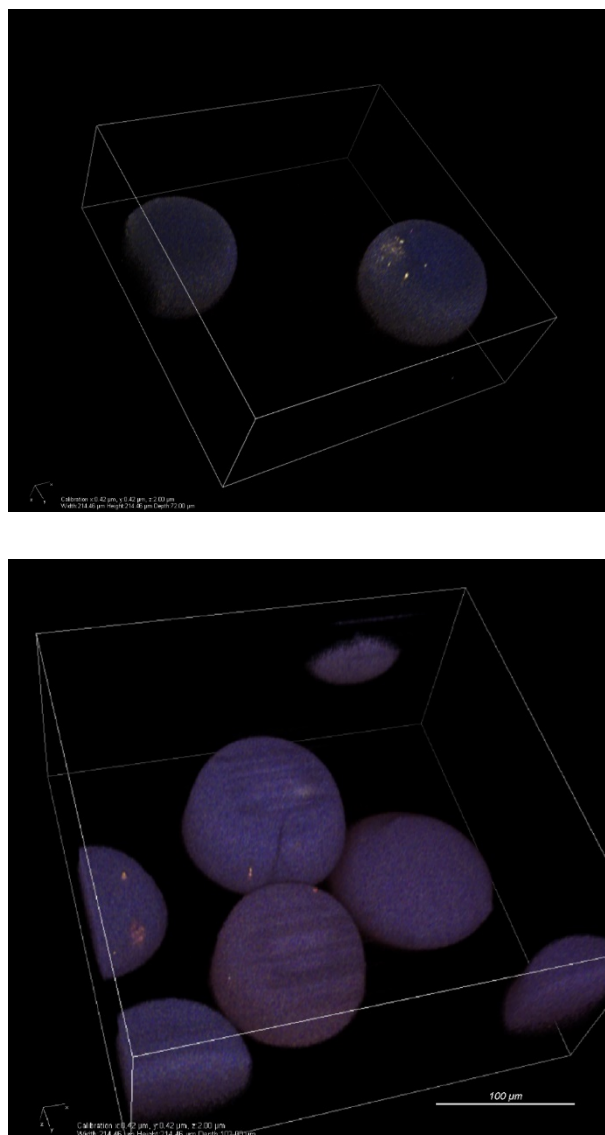

**Figure S7.** Two-photon microscopy images of DFO@Purolite (top) and Tb(DFO)@Purolite (bottom) beads showing the autofluorescence of DFO and luminescence of Tb(III), respectively, upon excitation at 750 nm by a NIR laser. Pictures collected on each of the four detection channels (400–492, 500–550, 563–588, 601–657 nm) were merged without any other spectral selection. The 3D z-stack views were constructed by superimposing the resulting images scanned along the depth (100  $\mu\text{m}$ ) of the samples.

## VI. Auxiliary equilibrium constants

**Table S1.** Values of the global protonation constants ( $\beta^{\circ}_{01z}$ ) of EDTA<sup>4-</sup>, of the hydrolysis ( $\beta^{\circ}_{x0z}$ ) and complex formation constants ( $\beta^{\circ}_{xyz}$ ) with EDTA<sup>4-</sup> of Fe<sup>3+</sup> and Zr<sup>4+</sup> at infinite dilution retrieved from the database implemented in the MEDUSA software.<sup>a</sup>

|                                                                     | $x$ | $y$ | $z$ | $\log \beta_{mlh}$ |
|---------------------------------------------------------------------|-----|-----|-----|--------------------|
| HEDTA <sup>3-</sup>                                                 | 0   | 1   | 1   | 11.24              |
| H <sub>2</sub> EDTA <sup>2-</sup>                                   | 0   | 1   | 2   | 18.04              |
| H <sub>3</sub> EDTA <sup>-</sup>                                    | 0   | 1   | 3   | 21.19              |
| H <sub>4</sub> EDTA                                                 | 0   | 1   | 4   | 23.42              |
| H <sub>5</sub> EDTA <sup>+</sup>                                    | 0   | 1   | 5   | 22.12              |
| H <sub>6</sub> EDTA <sup>2+</sup>                                   | 0   | 1   | 6   | 21.62              |
| H <sub>4</sub> EDTA <sub>(s)</sub>                                  | 0   | 1   | 4   | 27.22              |
| Fe(EDTA) <sup>-</sup>                                               | 1   | 1   | 0   | 27.8               |
| Fe(HEDTA)                                                           | 1   | 1   | 1   | 29.3               |
| Fe(EDTA)(OH) <sup>2-</sup>                                          | 1   | 1   | -1  | 19.97              |
| Fe <sub>2</sub> (EDTA) <sub>2</sub> (OH) <sub>2</sub> <sup>4-</sup> | 2   | 2   | -2  | 41.8               |
| Fe(OH) <sup>2+</sup>                                                | 1   | 0   | -1  | -2.19              |
| Fe(OH) <sub>2</sub> <sup>+</sup>                                    | 1   | 0   | -2  | -5.67              |
| Fe(OH) <sub>3</sub>                                                 | 1   | 0   | -3  | -12.56             |
| Fe(OH) <sub>4</sub> <sup>-</sup>                                    | 1   | 0   | -4  | -21.6              |
| Fe <sub>2</sub> (OH) <sub>2</sub> <sup>4+</sup>                     | 2   | 0   | -2  | -2.95              |
| Fe <sub>3</sub> (OH) <sub>4</sub> <sup>5+</sup>                     | 3   | 0   | -4  | -6.3               |
| Fe(OH) <sub>3(am)</sub>                                             | 1   | 0   | -3  | -4.891             |
| Fe <sub>2</sub> O <sub>3(cr)</sub>                                  | 2   | 0   | -6  | -0.408             |
| FeOOH <sub>(s)</sub>                                                | 1   | 0   | -3  | -1                 |
| Zr(EDTA)                                                            | 1   | 1   | 0   | 31.1               |
| Zr(OH) <sup>3+</sup>                                                | 1   | 0   | -1  | 0.3                |
| Zr(OH) <sub>2</sub> <sup>2+</sup>                                   | 1   | 0   | -2  | -1.7               |
| Zr(OH) <sub>3</sub> <sup>+</sup>                                    | 1   | 0   | -3  | -5.1               |
| Zr(OH) <sub>4</sub>                                                 | 1   | 0   | -4  | -9.7               |
| Zr <sub>3</sub> (OH) <sub>4</sub> <sup>8+</sup>                     | 3   | 0   | -4  | -0.6               |
| Zr <sub>4</sub> (OH) <sub>8</sub> <sup>8+</sup>                     | 4   | 0   | -8  | 6                  |
| ZrO <sub>2(s)</sub>                                                 | 1   | 0   | -4  | -1.9               |

<sup>a</sup> I. Puigdomenech, *MEDUSA – Chemical Equilibrium Diagrams Program*, (2010), Royal Institute of Technology: Stockholm, Sweden (<https://www.kth.se/che/medusa/>).
